# Supplementary material
Source: Springer Nature journal article supplement (https://www.springermedizin.de/resource/supplementary/13002_2010_189_MOESM6_ESM.pdf/9627350)

number of  
respondents  
(n=90)

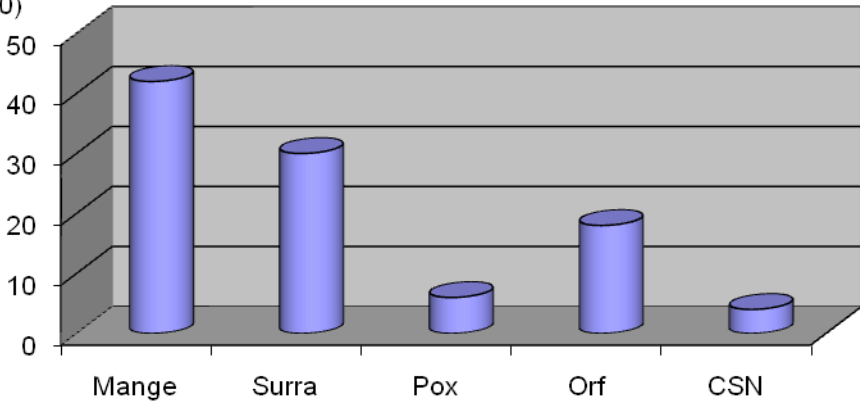

Supplement: MOESM6 [file 9627350]
